# Supplementary material for: Prediction of magnetoresistance using a magnetic field and correlation between the magnetic and electrical properties of La0.7Bi0.05Sr0.15Ca0.1Mn1−xInxO3 (0 ≤ x ≤ 0.3) manganite
Source: Royal Society of Chemistry journal article supplement (doi:10.1039/c7ra04256f), 2017-01-01
Supplement: c7ra04256f1.pdf [file c7ra04256f1.pdf]

### All refinement data for ALL values of x

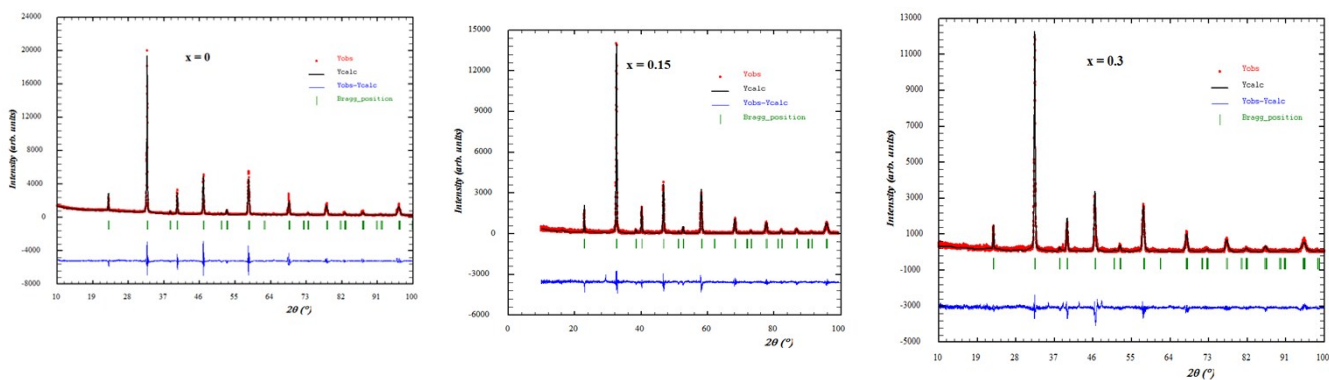

### All magnetic data

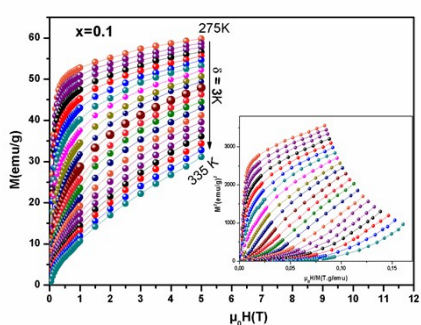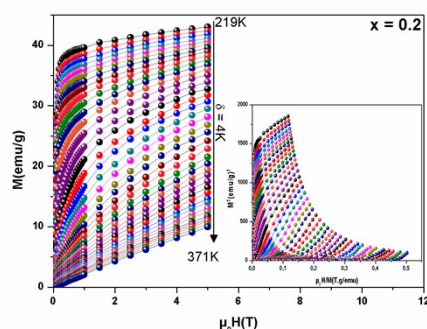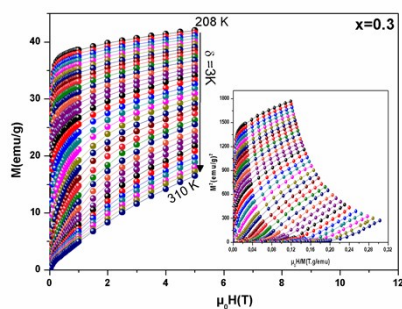

The plot of the lattice parameters a and c and the volume of all samples.

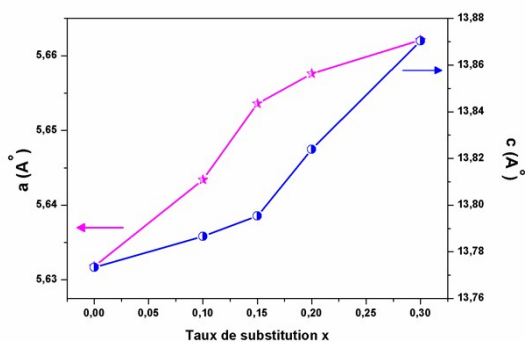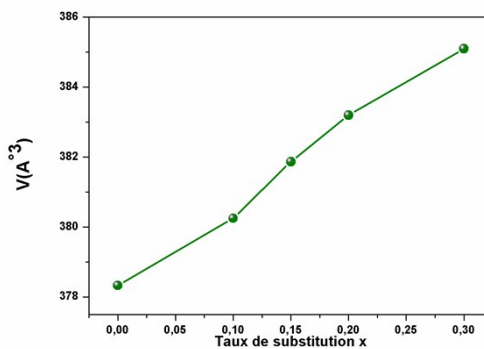

|                                                                                                                                            | Calculated Gauss function                                                                            | R <sup>2</sup> |
|--------------------------------------------------------------------------------------------------------------------------------------------|------------------------------------------------------------------------------------------------------|----------------|
| La <sub>0.7</sub> Bi <sub>0.05</sub> Sr <sub>0.15</sub> Ca <sub>0.1</sub> MnO <sub>3</sub> , <b>0T</b>                                     | $\rho(T) = 0.066 + \frac{24.677}{73.408\sqrt{\pi/2}} \exp\left(-2(T - 289.636)^2 / 73.408^2\right)$  | 0.996          |
| La <sub>0.7</sub> Bi <sub>0.05</sub> Sr <sub>0.15</sub> Ca <sub>0.1</sub> MnO <sub>3</sub> , <b>2T</b>                                     | $\rho(T) = 0.035 + \frac{14.211}{81.173\sqrt{\pi/2}} \exp\left(-2(T - 291.101)^2 / 81.173^2\right)$  | 0.990          |
| La <sub>0.7</sub> Bi <sub>0.05</sub> Sr <sub>0.15</sub> Ca <sub>0.1</sub> MnO <sub>3</sub> , <b>5T</b>                                     | $\rho(T) = 0.0234 + \frac{10.734}{88.224\sqrt{\pi/2}} \exp\left(-2(T - 291.254)^2 / 88.224^2\right)$ | 0.982          |
| La <sub>0.7</sub> Bi <sub>0.05</sub> Sr <sub>0.15</sub> Ca <sub>0.1</sub> Mn <sub>0.9</sub> In <sub>0.1</sub> O <sub>3</sub> , <b>0T</b>   | $\rho(T) = 0.114 + \frac{35.299}{68.330\sqrt{\pi/2}} \exp\left(-2(T - 277.533)^2 / 68.330^2\right)$  | 0.997          |
| La <sub>0.7</sub> Bi <sub>0.05</sub> Sr <sub>0.15</sub> Ca <sub>0.1</sub> Mn <sub>0.9</sub> In <sub>0.1</sub> O <sub>3</sub> , <b>2T</b>   | $\rho(T) = 0.056 + \frac{17.367}{74.500\sqrt{\pi/2}} \exp\left(-2(T - 279.057)^2 / 74.500^2\right)$  | 0.991          |
| La <sub>0.7</sub> Bi <sub>0.05</sub> Sr <sub>0.15</sub> Ca <sub>0.1</sub> Mn <sub>0.9</sub> In <sub>0.1</sub> O <sub>3</sub> , <b>5T</b>   | $\rho(T) = 0.039 + \frac{12.552}{79.743\sqrt{\pi/2}} \exp\left(-2(T - 279.327)^2 / 79.743^2\right)$  | 0.982          |
| La <sub>0.7</sub> Bi <sub>0.05</sub> Sr <sub>0.15</sub> Ca <sub>0.1</sub> Mn <sub>0.85</sub> In <sub>0.15</sub> O <sub>3</sub> , <b>0T</b> | $\rho(T) = 0.157 + \frac{45.970}{64.548\sqrt{\pi/2}} \exp\left(-2(T - 262.169)^2 / 64.548^2\right)$  | 0.997          |
| La <sub>0.7</sub> Bi <sub>0.05</sub> Sr <sub>0.15</sub> Ca <sub>0.1</sub> Mn <sub>0.85</sub> In <sub>0.15</sub> O <sub>3</sub> , <b>2T</b> | $\rho(T) = 0.081 + \frac{23.846}{70.376\sqrt{\pi/2}} \exp\left(-2(T - 263.610)^2 / 70.376^2\right)$  | 0.990          |
| La <sub>0.7</sub> Bi <sub>0.05</sub> Sr <sub>0.15</sub> Ca <sub>0.1</sub> Mn <sub>0.85</sub> In <sub>0.15</sub> O <sub>3</sub> , <b>5T</b> | $\rho(T) = 0.046 + \frac{14.253}{76.759\sqrt{\pi/2}} \exp\left(-2(T - 268.878)^2 / 76.759^2\right)$  | 0.982          |
| La <sub>0.7</sub> Bi <sub>0.05</sub> Sr <sub>0.15</sub> Ca <sub>0.1</sub> Mn <sub>0.8</sub> In <sub>0.2</sub> O <sub>3</sub> , <b>0T</b>   | $\rho(T) = 0.195 + \frac{73.589}{66.751\sqrt{\pi/2}} \exp\left(-2(T - 256.458)^2 / 66.751^2\right)$  | 0.996          |
| La <sub>0.7</sub> Bi <sub>0.05</sub> Sr <sub>0.15</sub> Ca <sub>0.1</sub> Mn <sub>0.8</sub> In <sub>0.2</sub> O <sub>3</sub> , <b>2T</b>   | $\rho(T) = 0.072 + \frac{30.025}{73.959\sqrt{\pi/2}} \exp\left(-2(T - 257.656)^2 / 73.959^2\right)$  | 0.990          |
| La <sub>0.7</sub> Bi <sub>0.05</sub> Sr <sub>0.15</sub> Ca <sub>0.1</sub> Mn <sub>0.8</sub> In <sub>0.2</sub> O <sub>3</sub> , <b>5T</b>   | $\rho(T) = 0.044 + \frac{18.585}{79.972\sqrt{\pi/2}} \exp\left(-2(T - 261.649)^2 / 79.972^2\right)$  | 0.980          |
| La <sub>0.7</sub> Bi <sub>0.05</sub> Sr <sub>0.15</sub> Ca <sub>0.1</sub> Mn <sub>0.7</sub> In <sub>0.3</sub> O <sub>3</sub> , <b>0T</b>   | $\rho(T) = 0.254 + \frac{110.831}{66.550\sqrt{\pi/2}} \exp\left(-2(T - 247.779)^2 / 66.550^2\right)$ | 0.995          |
| La <sub>0.7</sub> Bi <sub>0.05</sub> Sr <sub>0.15</sub> Ca <sub>0.1</sub> Mn <sub>0.7</sub> In <sub>0.3</sub> O <sub>3</sub> , <b>2T</b>   | $\rho(T) = 0.081 + \frac{42.494}{74.280\sqrt{\pi/2}} \exp\left(-2(T - 248.983)^2 / 74.280^2\right)$  | 0.991          |
| La <sub>0.7</sub> Bi <sub>0.05</sub> Sr <sub>0.15</sub> Ca <sub>0.1</sub> Mn <sub>0.7</sub> In <sub>0.3</sub> O <sub>3</sub> , <b>5T</b>   | $\rho(T) = 0.039 + \frac{22.161}{82.477\sqrt{\pi/2}} \exp\left(-2(T - 258.037)^2 / 82.477^2\right)$  | 0.984          |

**Table:** The results parameters estimated from Gauss function.
